# Supplementary material for: Harnessing sustainable nanoclusters for sensitive optical detection of tetracyclines and the underlying mechanism
Source: Royal Society of Chemistry journal article supplement (doi:10.1039/d4na00637b), 2024-01-01
Supplement: d4na00637b1.pdf [file d4na00637b1.pdf]

## Supporting Information for

### Harnessing Sustainable Nanoclusters for Sensitive Optical Detection of Tetracyclines and the Underlying Mechanism

Miguel Justo-Tirado<sup>1</sup>, Irene Pérez-Herráez<sup>1</sup>, Jorge Escorihuela<sup>2</sup>, Raúl Arenal,<sup>3,4,5</sup> Elena Zaballo-García<sup>2\*</sup>, and Julia Pérez-Prieto<sup>1\*</sup>

<sup>1</sup>Instituto de Ciencia Molecular (ICMol), Universitat de València, Catedrático José Beltrán 2, Paterna, Valencia, Spain

<sup>2</sup>Departamento de Química Orgánica, Universitat de València, Av. Vicent Andres Estelles s/n, Burjassot, Spain

<sup>3</sup>Instituto de Nanociencia y Materiales de Aragon (INMA), CSIC-Universidad de Zaragoza, 50009 Zaragoza, Spain

<sup>4</sup>Laboratorio de microscopias avanzadas (LMA), U. Zaragoza, C/ Mariano Esquillor s/n, 50018 Zaragoza, Spain

<sup>5</sup>ARAID Foundation, 50018 Zaragoza, Spain

|                                                                               |    |
|-------------------------------------------------------------------------------|----|
| Evolution of the synthesis of AuNC@NAC .....                                  | 2  |
| PL spectra of AuNC@NAC at different excitation wavelengths .....              | 2  |
| TEM and HRTEM images, EDAX and mapping of AuNC@NAC.....                       | 3  |
| Comparison between the FT-IR spectra of NAC and AuNC@NAC .....                | 5  |
| TGA of AuNC@NAC and NAC .....                                                 | 6  |
| ICP-MS analysis of AuNC@NAC and estimation of NAC molecules per AuNC@NAC..... | 7  |
| MALDI-MS spectra of AuNC@NAC .....                                            | 8  |
| C1s XPS analysis of AuNC@NAC .....                                            | 8  |
| Comparison of the existing method for TC detection .....                      | 9  |
| Detection of TC in water samples.....                                         | 10 |
| Time-resolved photoluminescence studies of AuNC@NAC at different [TC] .....   | 10 |
| FT-IR spectrum of AuNC@NAC upon addition of TC .....                          | 11 |
| Different coordination modes of NAC ligand with AuNC@NAC .....                | 11 |
| Estimation of energy levels of Au@NAC and TC.....                             | 12 |
| References .....                                                              | 14 |

## Evolution of the synthesis of AuNC@NAC

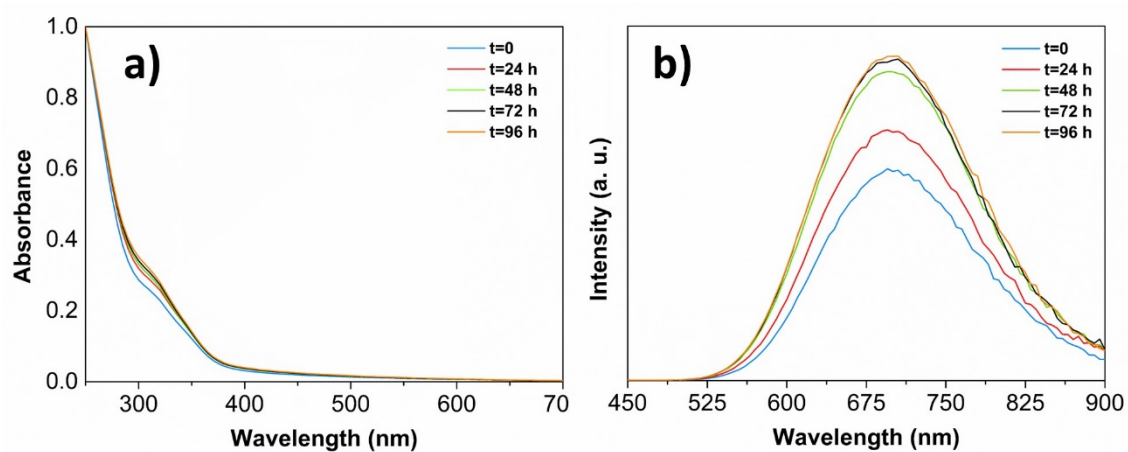

**Figure S1.** (a) Absorbance and (b) PL spectra of the evolution of the AuNC@NAC synthesis at the indicated times.

## PL spectra of AuNC@NAC at different excitation wavelengths

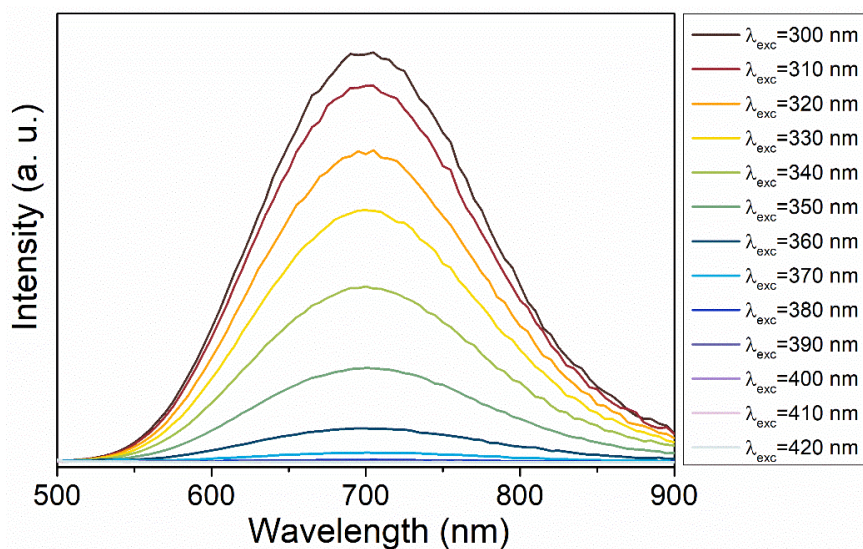

**Figure S2.** PL spectra of AuNC@NAC varying the excitation wavelength from 300 to 420 nm.

### TEM and HRTEM images, EDAX and mapping of AuNC@NAC

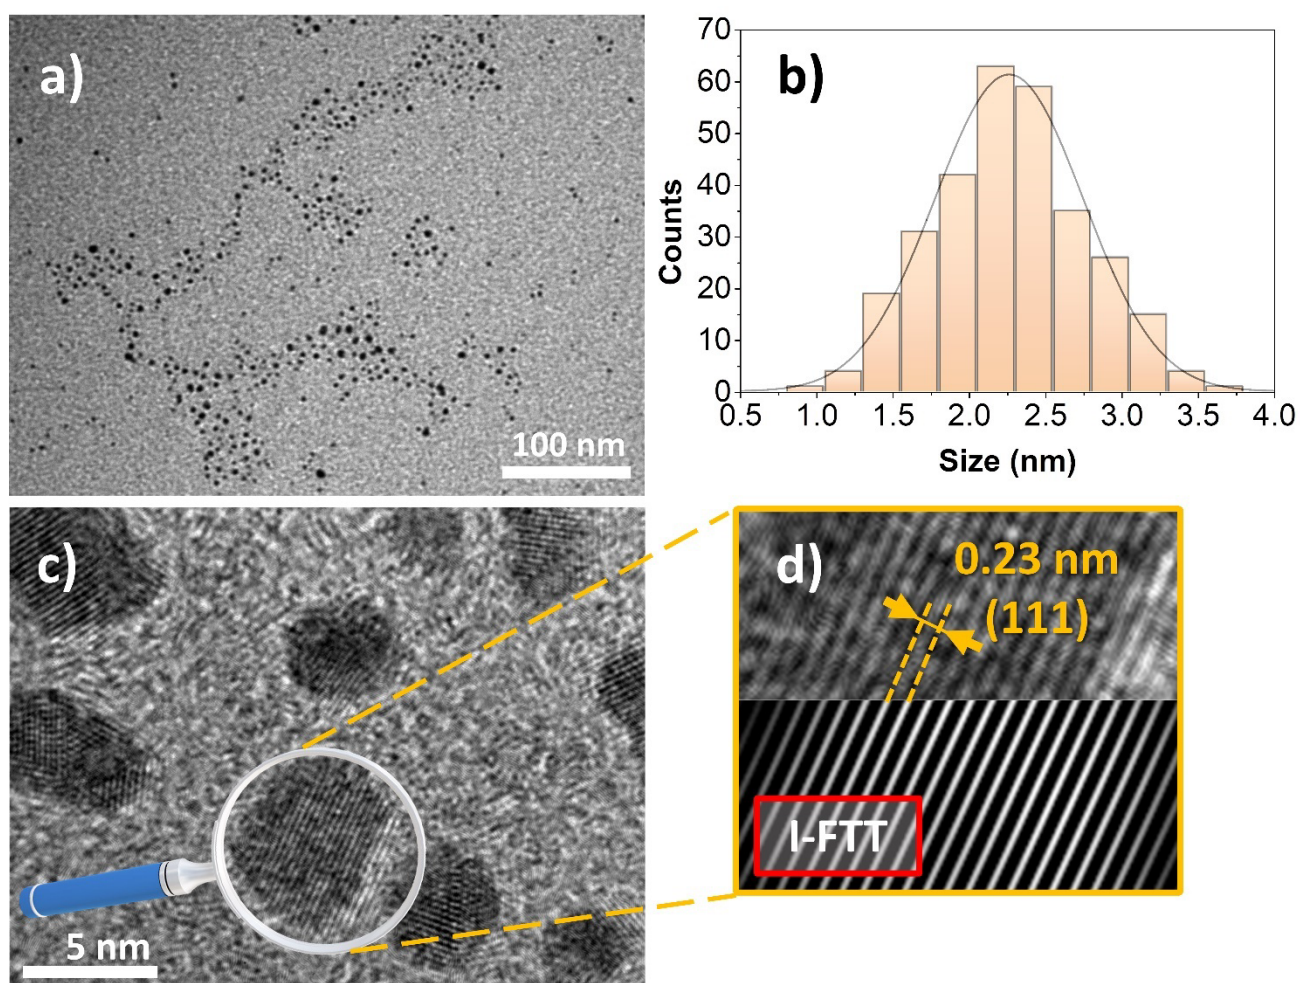

**Figure S3.** (a) TEM image of AuNC@NAC. (b) Size distribution of AuNCs. (c) HRTEM image of the AuNC@NAC. (d) Selected areas of the image including the *i*-FFT region of the (111) planes, attributed to the distinctive spacing between planes in gold (Au).

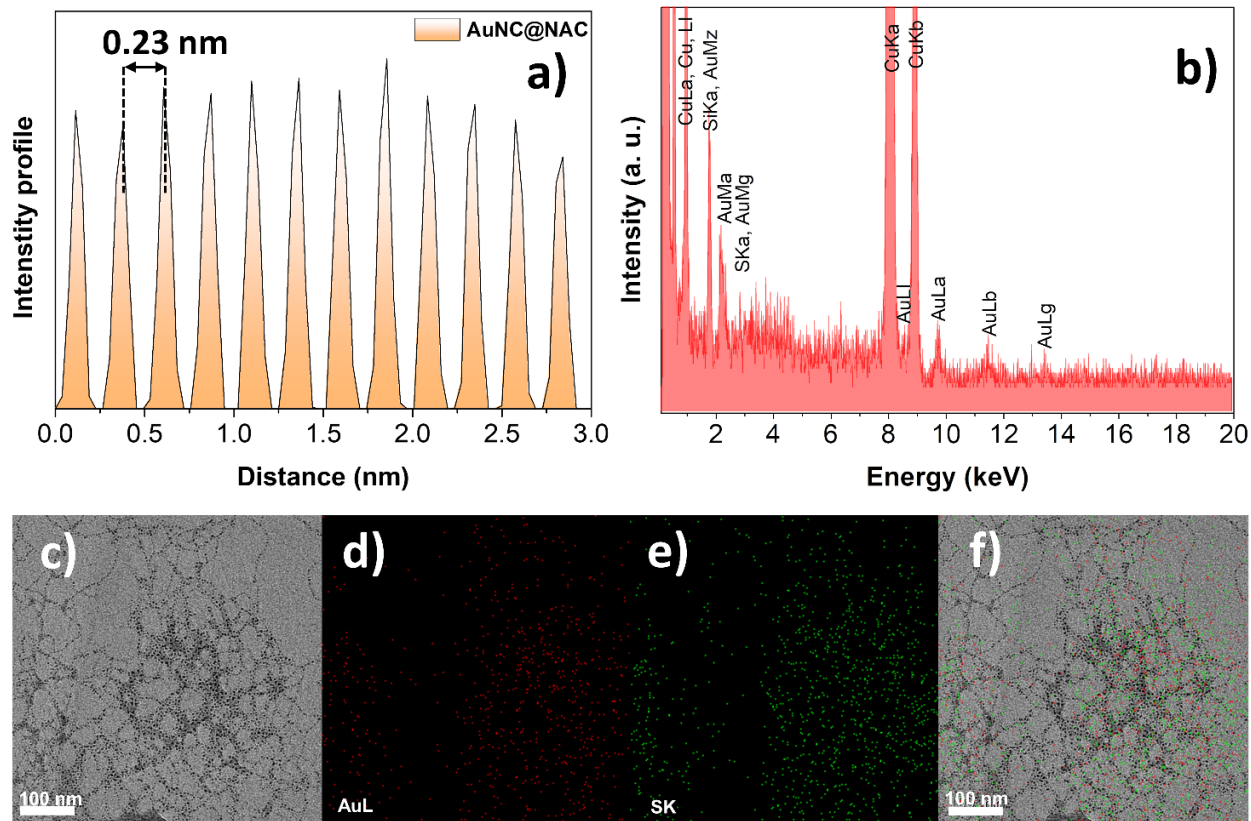

**Figure S4.** (a) Characteristic distance between planes of Au. (b) EDAX spectrum of AuNC@NAC. (c) HRTEM image of AuNC@NAC and the mapping of the signals of the same region for (d) AuL and (e) SK. (f) Overlapped images c-e.

### Comparison between the FT-IR spectra of NAC and AuNC@NAC

The FT-IR spectra of free NAC and AuNC@NAC are shown in Figure S5. The band centered at  $3370\text{ cm}^{-1}$  in the spectra of free NAC may arise from stretching vibration of the  $\text{-OH}$  and  $\text{-NH}$  groups and  $\text{H}_2\text{O}$  bound on the AuNCs surface. In the curve of free NAC, the characteristic band at  $2544\text{ cm}^{-1}$  is attributed to S-H group, the bands at  $1713$  and  $1276\text{ cm}^{-1}$  are corresponding to carboxyl group, the bands at  $1190\text{-}1170\text{ cm}^{-1}$  are ascribed to C-N group and the band centered at  $1525\text{ cm}^{-1}$  is due to N-H bending vibrations of  $\text{-NH-}$  group. The disappearance of the characteristic band of S-H group in the curve of AuNC@NAC indicates the successful bonding between the sulfur atom and the surface of the nanocluster. The shift of the  $\text{-OH}$ ,  $\text{C=O}$  and  $\text{N-H}$  peaks provides the evidence of electrostatic interaction between carboxyl and secondary amine group of NAC and the Au atoms of the surface of AuNCs.<sup>1,2</sup> The broad signal at  $3572\text{ cm}^{-1}$  may be to the  $\text{-OH}$  stretching vibration. This peak tends to be very strong and very broad and is red-shifted to  $3524\text{ cm}^{-1}$ .

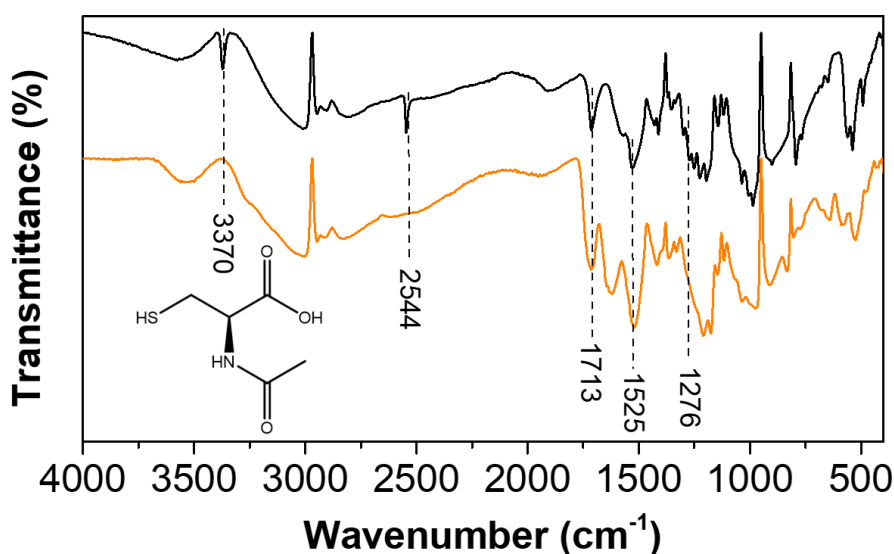

**Figure S5.** FT-IR spectra of free NAC (black line) and the as-synthesized AuNC@NAC (orange line). Inset: chemical structure of NAC.

## TGA of AuNC@NAC and NAC

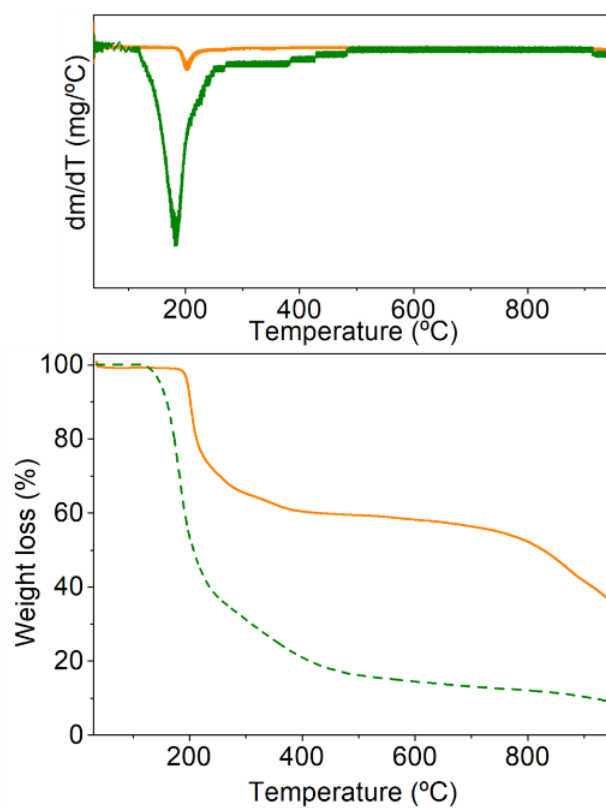

**Figure S6.** First derivatives and TGA of the AuNC@NAC (orange line) and the free NAC (green dashed line).

## ICP-MS analysis of AuNC@NAC and estimation of NAC molecules per AuNC@NAC

**Table S1.** ICP-MS analysis of AuNC@NAC.

|                 | Au (mg/mL) | S (mg/mL)  |
|-----------------|------------|------------|
| <b>AuNC@NAC</b> | 499 ± 2    | 92.1 ± 1.3 |

- Particle diameter (D)

$$D = 2.2 \text{ nm}$$

- Particle volume (V)

$$V = \frac{4}{3}\pi\left(\frac{D}{2}\right)^3 = \frac{4}{3}\pi\left(\frac{2.2}{2}\right)^3 = 5.575 \text{ nm}^3$$

- Gold FCC lattice constant (L)

$$L = 0.408 \text{ nm}$$

- Unit cell volume (U)

$$U = L^3 = 0.068 \text{ nm}^3$$

- Number of cell unit (B)

$$B = \frac{V}{U} = \frac{5.575 \text{ nm}^3}{0.068 \text{ nm}^3} = 81.985$$

- Gold atoms per particle (P)

$$P = 4 \cdot B = 4 \cdot 81.985 = 327.94$$

- [Ligand] in sample (H)

$$92.1 \frac{\text{mg}}{\text{L}} \cdot 1 \text{ ml} \cdot \frac{1 \text{ L}}{1000 \text{ ml}} = 0.0921 \text{ mg S}$$

$$n = \frac{m}{Mr} = \frac{\frac{0.0921}{1000} \text{ g}}{32.065 \frac{\text{g}}{\text{mol}}} = 2.87 \times 10^{-6} \text{ mol S}$$

$$H = 2.87 \times 10^{-6} \text{ mol S} \cdot \frac{1 \text{ mol NAC}}{1 \text{ mol S}} = 2.87 \times 10^{-6} \text{ mol NAC}$$

- [Au] in sample (A)

$$499 \frac{\text{mg}}{\text{L}} \cdot 1 \text{ ml} \cdot \frac{1 \text{ L}}{1000 \text{ ml}} = 0.499 \text{ mg Au}$$

$$n = \frac{m}{Mr} = \frac{\frac{0.499}{1000} \text{ g}}{196.97 \frac{\text{g}}{\text{mol}}} = 2.53 \times 10^{-6} \text{ mol Au}$$

$$A = 2.53 \times 10^{-6} \text{ mol Au}$$

## MALDI-MS spectra of AuNC@NAC

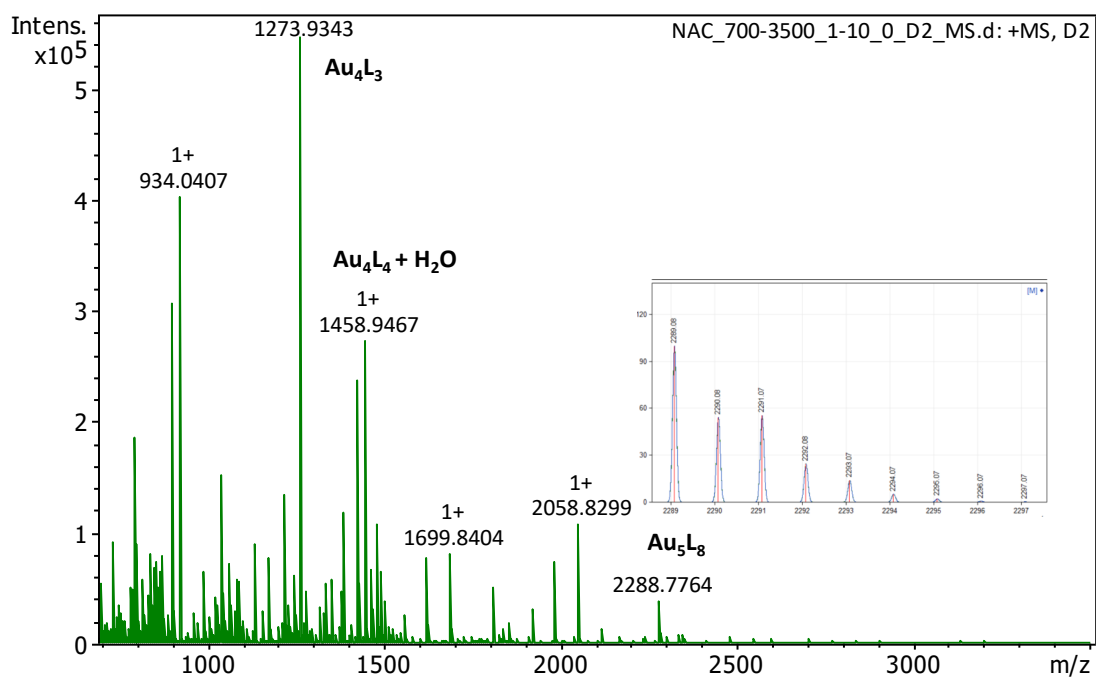

Figure S7. MALDI-MS spectra of AuNC@NAC.

## C1s XPS analysis of AuNC@NAC

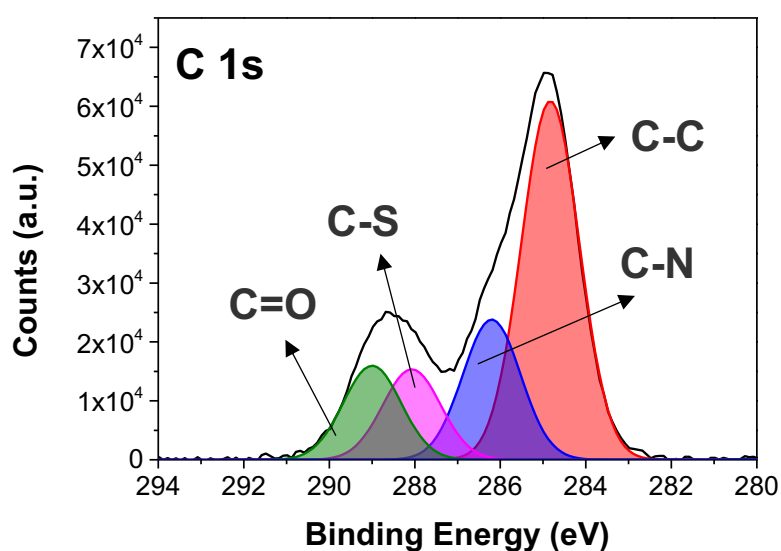

Figure S8. High resolution XPS C1s spectrum showed peaks at 285 eV, 286.5 eV 288 and 289 eV derived from C-C, C-N, C-S and C=O bonds respectively, in AuNC@NAC.



## Comparison of the existing method for TC detection

**Table S2.** Comparison of the proposed method with other methods for the detection of TC based on fluorescence nanomaterials.

|                             | AuNC@NAC     | QD/CdTe <sup>3</sup> | ZnO nanorods <sup>4</sup>    | DA-CuNCs <sup>5</sup> | N-doped carbon dots <sup>6</sup> | MoS <sub>2</sub> nanoplates <sup>7</sup> | Carbon dots <sup>8</sup> |
|-----------------------------|--------------|----------------------|------------------------------|-----------------------|----------------------------------|------------------------------------------|--------------------------|
| <b>Synthesis conditions</b> | 25 °C, >24 h | 50 °C, >10 h         | 100 °C, 10 h<br>25 °C, >24 h | 55 °C, 12 h           | 180 °C, 4 h                      | 200 °C, 24 h                             | 25 °C, 3 h               |
| <b>Φ<sub>PL</sub> (%)</b>   | 1            | -                    | -                            | -                     | 10                               | 8                                        | -                        |
| <b>Incubation time</b>      | -            | 20 min               | 5 min                        | 10 min                | 10 min                           | 5 min                                    | -                        |
| <b>Linear range (μM)</b>    | 0.1–140      | 70–2200              | 2–120                        | 3.6–1000              | 2–200                            | 0.1–50                                   | 10–400                   |
| <b>LOD (μM)</b>             | 2            | 2.10                 | 1.27                         | 0.92                  | 0.6                              | 0.032                                    | 6.0                      |

**Table S3.** Comparison of the proposed method with other methods for the detection of TC based on other nanocluster nanomaterials.

| Ref.             | NC core | Ligand                        | Linear range (μM) | LOD (μM) | LOD (ppm) |
|------------------|---------|-------------------------------|-------------------|----------|-----------|
| <b>9</b>         | AgNCs   | NAC                           | 1.12-230          | 0.47     | 0.21      |
| <b>10</b>        | AuNCs   | Glutathione                   | 50-10000          | 5.31     | 2.36      |
| <b>11</b>        | AuNCs   | Histidine (Eu <sup>3+</sup> ) | 0.01-60           | 0.004    | 0.002     |
| <b>12</b>        | AuNCs   | Ovalbumin                     | 0.03-500          | 0.09     | 0.04      |
| <b>13</b>        | CuNCs   | NAC                           | 0-20              | 5.6      | 2.5       |
| <b>14</b>        | CuNCs   | Dopamine                      | 3.6-1000          | 0.92     | 0.41      |
| <b>15</b>        | CuNCs   | Histidine                     | 0.1-110           | 0.047    | 0.021     |
| <b>This work</b> | AuNCs   | NAC                           | 0.1-140           | 1.8      | 0.8       |

## Detection of TC in water samples

**Table S4.** Results of the recovery studies of TC in water using the proposed sensing method.

| Sample    | Added ( $\mu\text{M}$ ) | Found ( $\mu\text{M}$ ) | Recovery (%) |
|-----------|-------------------------|-------------------------|--------------|
| Tap water | 0                       | -                       | -            |
|           | 30                      | 27.0                    | 90           |
|           | 50                      | 49.7                    | 99.4         |
|           | 60                      | 64.8                    | 108          |

## Time-resolved photoluminescence studies of AuNC@NAC at different [TC]

**Table S5.** Fluorescence lifetime fitting parameters for AuNC@NAC under different [TC]. The results were obtained with tri-exponential model.

$$\sum \alpha_i \exp(-t / \tau_i) \quad (i=1 \dots 3).$$

| [TC] ( $\mu\text{M}$ ) | $\chi^2$ | $\tau_{\text{av}}$ (ns) | $\tau_1$ (ns)                  | $\tau_2$ (ns)                   | $\tau_3$ (ns)                    |
|------------------------|----------|-------------------------|--------------------------------|---------------------------------|----------------------------------|
| 0                      | 3.380    | 325.91                  | 15.37<br>( $\alpha_1=7.17\%$ ) | 82.31<br>( $\alpha_2=27.96\%$ ) | 466.92<br>( $\alpha_3=64.87\%$ ) |
| 1                      | 3.374    | 318.76                  | 15.24<br>( $\alpha_1=8.14\%$ ) | 82.83<br>( $\alpha_2=24.57\%$ ) | 443.47<br>( $\alpha_3=67.29\%$ ) |
| 5                      | 3.376    | 303.95                  | 9<br>( $\alpha_1=3.06\%$ )     | 48.32<br>( $\alpha_2=21.37\%$ ) | 389<br>( $\alpha_3=75.56\%$ )    |
| 15                     | 3.507    | 283.44                  | 5.54<br>( $\alpha_1=2.94\%$ )  | 44.96<br>( $\alpha_2=22.28\%$ ) | 365.64<br>( $\alpha_3=74.78\%$ ) |
| 30                     | 3.77     | 268.06                  | 6.81<br>( $\alpha_1=4.73\%$ )  | 52.11<br>( $\alpha_2=26.83\%$ ) | 371.3<br>( $\alpha_3=68.43\%$ )  |
| 50                     | 3.438    | 244.85                  | 5.04<br>( $\alpha_1=5.74\%$ )  | 40.74<br>( $\alpha_2=19.81\%$ ) | 317.6<br>( $\alpha_3=74.46\%$ )  |
| 100                    | 4.486    | 216.12                  | 2.58<br>( $\alpha_1=2.52\%$ )  | 26.05<br>( $\alpha_2=17.62\%$ ) | 264.8<br>( $\alpha_3=79.86\%$ )  |
| 200                    | 4.225    | 181.37                  | 3.67<br>( $\alpha_1=11.49\%$ ) | 29.91<br>( $\alpha_2=16.89\%$ ) | 245.63<br>( $\alpha_3=71.61\%$ ) |
| 500                    | 5.237    | 101.77                  | 2.92<br>( $\alpha_1=15.59\%$ ) | 22.7<br>( $\alpha_2=23.09\%$ )  | 156.67<br>( $\alpha_3=61.32\%$ ) |

### FT-IR spectrum of AuNC@NAC upon addition of TC

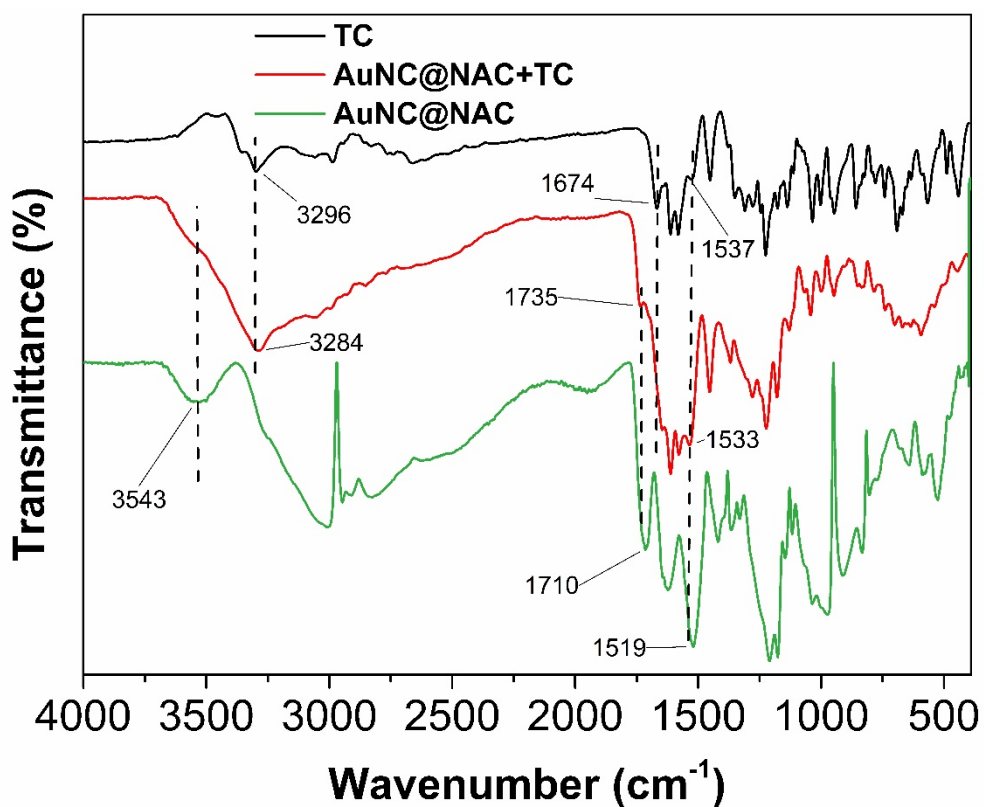

**Figure S9.** FT-IR spectra of (a) TC (black line), AuNC@NAC+TC (red line) and the as-synthesized AuNC@NAC (green line).

### Different coordination modes of NAC ligand with AuNC@NAC

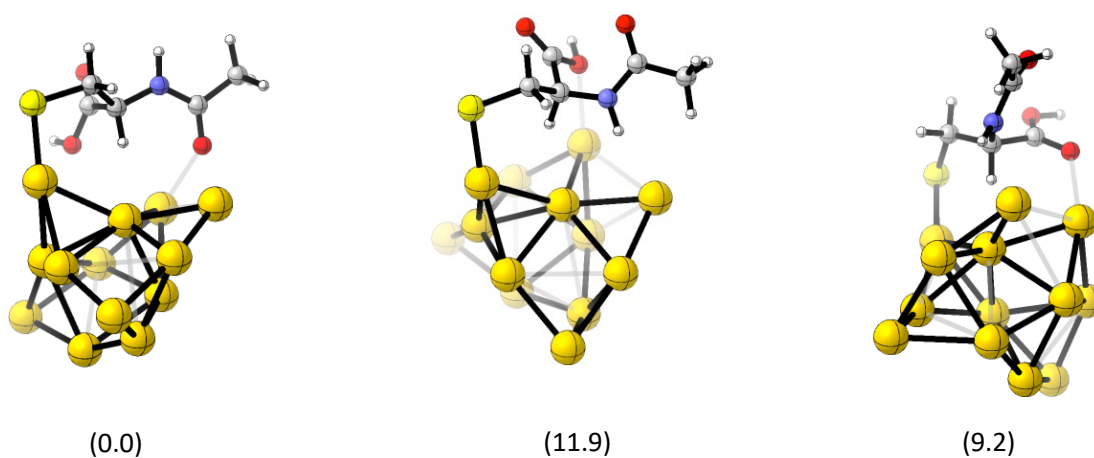

**Figure S10.** Optimized structures of a model AuNC@NAC composed of a core of 13 Au atoms at the B3LYP-D3/def2TZVP (SDD for Au) level of theory.

## Estimation of energy levels of Au@NAC and TC

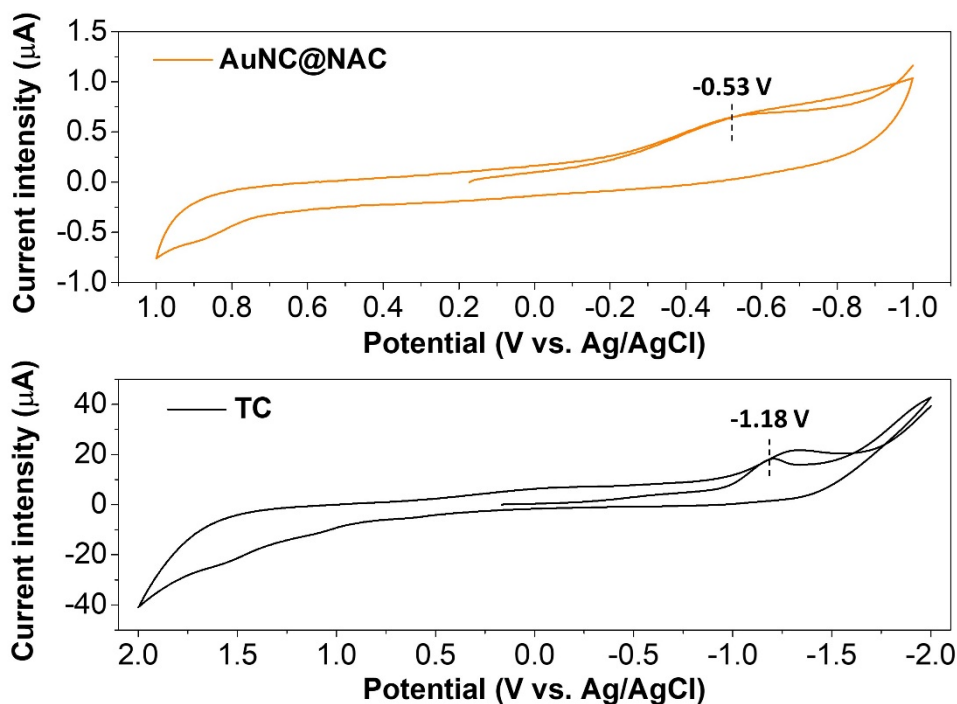

**Figure S11.** Cyclic Voltammetric (CV) curves of Au@NAC (top) and TC (down) to Ag/Ag<sup>+</sup> electrodes.

For estimating HOMO/VB and LUMO/CB energies from CV measurements in solution, the following equations are used from literature:

$$E_{HOMO/VB} = -[V_{ox} - V_{(Fc/Fc^+)} + 4.8] \text{ eV} \quad (\text{S1})$$

$$E_{LUMO/CB} = -[V_{red} - V_{(Fc/Fc^+)} + 4.8] \text{ eV} \quad (\text{S2})$$

Where  $V_{ox}$  and  $V_{red}$  are the irreversible oxidation and reduction peaks determined in the peak in the cyclic voltamperograms (CV) measurements,  $V_{(Fc/Fc^+)}$  is the oxidation potential at semi-wave of Fc/Fc<sup>+</sup> couple external reference in water<sup>16,17</sup> and 4.8 is the energy of Fc/Fc<sup>+</sup> to against vacuum.

In the case of AuNC@NAC, the reduction is irreversible and is determined from the peak value of -0.53 V. Therefore, the calculated conducting band energy (VB) is -3.87 eV vs vacuum. Assuming the oxidation potential of the material is not easily found due to the huge band-gap the AuNC have, we could estimate its value by using the following approximation:<sup>18-20</sup>

$$E_{CB} = E_{VB} + \Delta E^{Opt} \rightarrow E_{VB} = E_{CB} - \Delta E^{Opt} \quad (\text{S3})$$

The optical gap ( $\Delta E^{Opt}$ ) could be estimated only roughly by observing the reported experimental UV-Vis spectrum<sup>21-25</sup> and resulted to be on the interval of 3.5 eV for the AuNC@NAC and 3.1 eV for the TC. The photon energy,  $E$ , is inversely proportional to the wavelength, as described by the equation:

$$E = \frac{hc}{\lambda} \quad (\text{S4})$$

where  $h$  is Planck's constant ( $6.6261 \cdot 10^{-34}$  J·s) and  $c$  is the speed of light ( $2.9979 \cdot 10^8$  m/s).

Since 1 eV is equivalent to  $1.6022 \cdot 10^{-19}$  J, the  $\Delta E^{\text{Opt}}$  values of 3.5 eV and 3.1 eV were calculated for AuNC@NAC and TC, respectively.

The calculated BV energy is around -7.37 eV. These values for VB and CB are consistent with previously reported values.<sup>26,27</sup>

Whereas, in the case of TC something similar happens. It is also observed the irreversible reduction potential at -1.18 V. Thus, with the approximation used before, the LUMO and HOMO energies are -3.22 eV and -6.32 eV. The estimated energy levels are summarized in **Table S4**.

**Table S6. Energy levels.**

|                 | $V_{\text{ox}}$ (V) | $E_{\text{HOMO}}/\text{VB}$ (eV) | $V_{\text{red}}$ (V) | $E_{\text{LUMO}}/\text{CB}$ (eV) | $\Delta E^{\text{opt}}$ (eV) |
|-----------------|---------------------|----------------------------------|----------------------|----------------------------------|------------------------------|
| <b>AuNC@NAC</b> | -                   | -7.37*                           | -0.53                | -3.87                            | 3.5                          |
| <b>TC</b>       | -                   | -6.32*                           | -1.18                | -3.22                            | 3.1                          |

\* Calculated from equation S3.

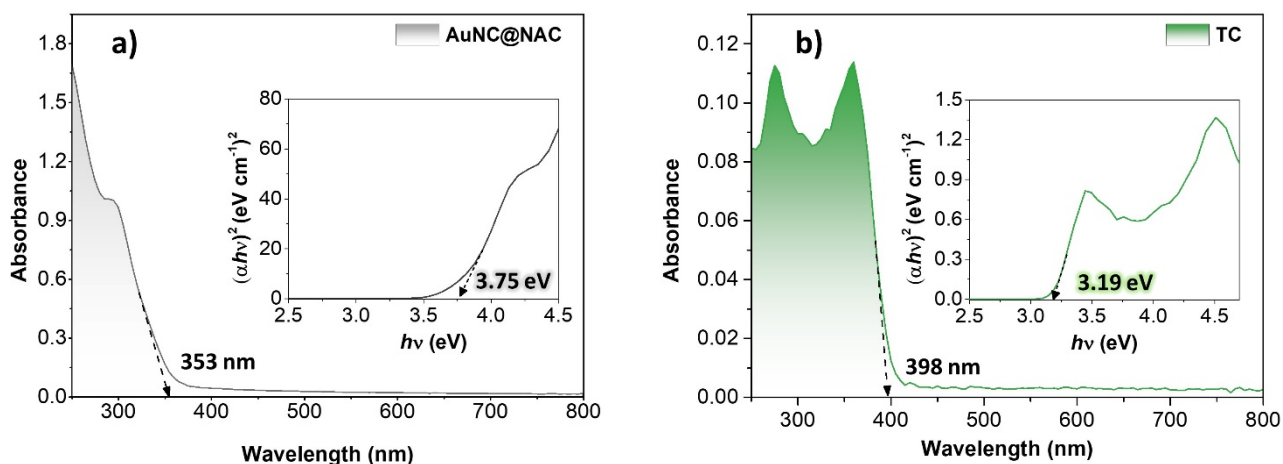

**Figure S12.** Absorption spectra and the spectrum on the energy scale (inset) for the (a) AuNC@NAC and (b) TC.

## References

- 1 Y. Zhang, M. Lv, P. Gao, G. Zhang, L. Shi, M. Yuan and S. Shuang, *Sensors Actuators, B Chem.*, 2021, **326**, 129009.
- 2 W. Du, L. Liao, L. Yang, A. Qin and A. Liang, *Sci. Rep.*, 2017, **7**, 1–12.
- 3 M.-R. Chao, C.-W. Hu and J.-L. Chen, *Anal. Chim. Acta*, 2016, **925**, 61–69.
- 4 Z. Zhou, K. Lu, X. Wei, T. Hao, Y. Xu, X. Lv and Y. Zhang, *RSC Adv.*, 2016, **6**, 71061–71069.
- 5 L. Wang, H. Miao, D. Zhong and X. Yang, *Anal. Methods*, 2016, **8**, 40–44.
- 6 B. Al-Hashimi, K. M. Omer and H. S. Rahman, *Arab. J. Chem.*, 2020, **13**, 5151–5159.
- 7 P. Jia, T. Bu, X. Sun, Y. Liu, J. Liu, Q. Wang, Y. Shui, S. Guo and L. Wang, *Food Chem.*, 2019, **297**, 124969.
- 8 Y. Yan, J. H. Liu, R. S. Li, Y. F. Li, C. Z. Huang and S. J. Zhen, *Anal. Chim. Acta*, 2019, **1063**, 144–151.
- 9 Y. Zhang, M. Lv, P. Gao, G. Zhang, L. Shi, M. Yuan and S. Shuang, *Sensors Actuators B Chem.*, 2021, **326**, 129009.
- 10 D. Liu, X. Pan, W. Mu, C. Li and X. Han, *Anal. Sci.*, 2019, **35**, 367–370.
- 11 Y. Li, Q. Du, X. Zhang and Y. Huang, *Talanta*, 2020, **206**, 120202.
- 12 F. Zhang, M. Liu, R. Liu, J. Li, Y. Sang, Y. Tang, X. Wang and S. Wang, *Biosens. Bioelectron.*, 2021, **171**, 112701.
- 13 Z. Wang, C. C. Zhang, J. Gao and Q. Wang, *J. Lumin.*, 2017, **190**, 115–122.
- 14 L. Wang, H. Miao, D. Zhong and X. Yang, *Anal. Methods*, 2016, **8**, 40–44.
- 15 Z. Cai, R. Zhu, S. Chen, L. Wu, K. Qi and C. Zhang, *ChemistrySelect*, 2020, **5**, 3682–3687.
- 16 R. R. Gagne, C. A. Koval and G. C. Lisensky, *Inorg. Chem.*, 1980, **19**, 2854–2855.
- 17 A. M. Bond, E. A. McLennan, R. S. Stojanovic and F. G. Thomas, *Anal. Chem.*, 1987, **59**, 2853–2860.
- 18 S. Kumari, J. G. Sánchez, M. Imran, E. Aktas, D. A. González, L. Manna, E. Martínez-Ferrero and E. Palomares, *J. Mater. Chem. C*, 2023, **11**, 3788–3795.
- 19 J. T. Mulder, I. du Fossé, M. Alimoradi Jazi, L. Manna and A. J. Houtepen, *ACS Energy Lett.*, 2021, **6**, 2519–2525.
- 20 J. Tauc, R. Grigorovici and A. Vancu, *Phys. status solidi*, 1966, **15**, 627–637.
- 21 F. Muniz-Miranda, M. C. Menziani and A. Pedone, *J. Phys. Chem. C*, 2014, **118**, 7532–7544.
- 22 A. Das, T. Li, K. Nobusada, Q. Zeng, N. L. Rosi and R. Jin, *J. Am. Chem. Soc.*, 2012, **134**, 20286–20289.
- 23 F. Ambroz, J. L. Donnelly, J. D. Wilden, T. J. Macdonald and I. P. Parkin, *Nanomaterials*, 2019, **9**.
- 24 R. Jin, *Nanoscale*, 2015, **7**, 1549–1565.
- 25 4–7.
- 26 S. Maity, D. Bain, K. Bhattacharyya, S. Das, R. Bera, B. Jana, B. Paramanik, A. Datta and A. Patra, *J. Phys. Chem. C*, 2018, **122**, 13354–13362.
- 27 K. Marjit, G. Ghosh, S. Ghosh, D. Ghosh, A. Medda and A. Patra, *ACS Phys. Chem. Au*, 2023, **3**, 348–357.
